# Supplementary material
Source: PubMed Central journal article supplement (PMC3903402)
Supplement: NIHMS454814-supplement-supplement_1.pdf [file NIHMS454814-supplement-supplement_1.pdf]

**Supplementary Document**  
**for**  
**Functional Linear Model with Zero-value Coefficient Function**  
**at Sub-regions**

Jianhui Zhou, Nae-Yuh Wang, and Naisyin Wang

*University of Virginia, Johns Hopkins University, and University of Michigan*

**Algorithm for the Refinement Stage**

We present a practical algorithm here to implement the null region refinement and function estimation stage in Section 2.2 with  $D = 1$ .

**Knots Placement.** Denote the initial estimate of  $\mathcal{T}$  by  $\hat{\mathcal{T}}^{(0)} = \bigcup_{j=1}^J [a_j, c_j]$ , which is the union of the identified subintervals in Section 2.1.

KP.1 Remove the initial knots within  $[a_j, c_j]$ .

KP.2 On  $\hat{\mathcal{T}}^{(0),c}$ , evenly-spaced knots are placed, and the total number of this set of knots is  $k_{1,n} + 1$  with  $k_{1,n} < k_{0,n}$ . Denote this new set of knots by  $\mathcal{A}$ .

**Working Null-region with the One-step Group SCAD Estimator.** An iteration process is carried out in this step.

WN.1 Let  $l = 0$ .

WN.2 Take the working null region  $\mathcal{T}_l = \bigcup_{j=1}^J [a_j + l\delta_n, c_j - l\delta_n]$  when  $a_1 \neq 0$  and  $c_J \neq T$ . When  $a_1 = 0$  or  $c_J = T$ , the interval  $[0, c_1 - l\delta_n]$  or  $[a_J + l\delta_n, T]$  are counted into the working null region.

WN.3 The current knots on  $[0, T]$  contains the knots in  $\mathcal{A}$  and the boundaries of working null regions  $\mathcal{T}_k$  for  $k = 0, \dots, l$ . Using this set of knots, compute the variables in the approximate model (2.4).

WN.4 Get the initial value  $\tilde{\mathbf{b}}_1$  by least squares, and divide  $\tilde{\mathbf{b}}_1$  into  $\tilde{\mathbf{b}}_{1N,l}$  and  $\tilde{\mathbf{b}}_{1S,l}$  according to their association to  $\mathcal{T}_l$ .

WN.5 Estimate  $\mathbf{b}_1$  by minimizing  $Q_n(\mathcal{T}_l, \lambda, \mathbf{b})$  by LARS algorithm, where  $\lambda$  is selected by the criterion  $C(\mathcal{T}_l, \lambda)$  to be discussed below.

WN.6 Let  $l = l + 1$  and repeat WN.2-WN.5 until one interval  $[a_j, c_j]$  shrinks to the empty set.

The criterion  $C(\mathcal{T}_l, \lambda)$  can be generalized cross validation criterion (GCV), Akaike's information criterion (AIC), the Bayesian information criterion (BIC; Schwarz) and the residual information criterion (RIC). They are defined as

$$\begin{aligned} GCV(\mathcal{T}_l, \lambda) &= RSS/[n\{1 - d(\lambda)/n\}^2], \\ AIC(\mathcal{T}_l, \lambda) &= n\log(RSS/n) + 2d(\lambda), \\ BIC(\mathcal{T}_l, \lambda) &= n\log(RSS/n) + \log(n)d(\lambda), \\ RIC(\mathcal{T}_l, \lambda) &= \{n - d(\lambda)\}\log(\tilde{\sigma}^2) + d(\lambda)\{\log(n) - 1\} + 4/\{n - d(\lambda) - 2\}, \end{aligned}$$

where  $RSS$  is the residual sum of squares,  $d(\lambda)$  is the number of non-zero estimated coefficients when the tuning parameter is chosen to be  $\lambda$ , and  $\tilde{\sigma}^2 = RSS/\{n - d(\lambda)\}$ .

**Final Determination of the Refined Estimation of  $\mathcal{T}$  and  $\beta(t)$ .** Identify the  $l_f$  that reaches the smallest criterion value across  $l$  and  $\lambda$ .

FD.1 Let  $l_f = \arg \min_l C(\mathcal{T}_l, \arg \min_{\lambda > 0} C(\mathcal{T}_l, \lambda))$ . The refined estimate of the null region is  $\hat{\mathcal{T}} = \mathcal{T}_{l_f}$ .

FD.2 Let  $\hat{\mathbf{b}}_1 = \arg \min_{\mathbf{b}} Q_n(\hat{\mathcal{T}}, \arg \min_{\lambda > 0} C(\hat{\mathcal{T}}, \lambda), \mathbf{b})$ . The refined estimate of  $\beta(t)$  is  $\hat{\beta}(t) = \mathbf{B}_1^T(t)\hat{\mathbf{b}}_1$ , where  $\mathbf{B}_1^T(t)$  are the B-spline basis function generated in Step 2.3 using the knots in  $\mathcal{A}$  and the boundaries of working null regions  $\mathcal{T}_k$  for  $k = 0, \dots, l_f$ .

### Proofs

We use  $a_n > O_p(b_n)$  and  $a_n \geq O_p(b_n)$  to denote that, as  $n \rightarrow \infty$  with probability tending to 1,  $b_n/a_n \rightarrow 0$  and  $b_n/a_n$  is bounded from above, respectively. We need the following lemma.

**LEMMA 1** Let  $\mathbf{b}_0(n) = (b_{0,1}(n), b_{0,2}(n), \dots, b_{0,k_0,n+h}(n))^T$  and assume that  $\beta(t)$  has  $r$ th bounded derivative on  $[0, T]$  where  $r \geq 3$ . There exists a constant  $M_0$  such that for all  $b_{0,j}(n)$  which are associated with  $\mathcal{J}$ ,  $\max |b_{0,j}(n)| \leq M_0 k_{0,n}^{-r}$ .

Lemma 1 is a direct result of the local property of the B-spline basis functions. The proof of Lemma 1 is straightforward, and is thus omitted.

**Proof of the convergence rate of the initial estimator by least squares:**

We first prove the convergence rate of the initial estimator  $\tilde{\mathbf{b}}_1(n)$  of  $\mathbf{b}_1(n)$  by least squares in the refinement stage.

Define  $\boldsymbol{\epsilon}_1(n) = (\epsilon_{1,1}, \dots, \epsilon_{1,n})^T$  and  $\mathbf{e}(n) = (e_1, \dots, e_n)^T$ . Let  $L_n\{\mathbf{b}(n)\} = \sum_{i=1}^n (Y_i - \mathbf{z}_{1,i}\mathbf{b}(n))^2$ . Given  $\tilde{\mathbf{b}}_1(n)$  is the minimizer of  $L_n\{\mathbf{b}(n)\}$ , we have

$$\begin{aligned} & L_n\{\tilde{\mathbf{b}}_1(n)\} - L_n\{\mathbf{b}_1(n)\} \\ &= [\tilde{\mathbf{b}}_1(n) - \mathbf{b}_1(n)]^T \mathbf{Z}_1^T(n) \mathbf{Z}_1(n) [\tilde{\mathbf{b}}_1(n) - \mathbf{b}_1(n)] - 2(\mathbf{Z}_1^T(n) \boldsymbol{\epsilon}_1(n)) [\tilde{\mathbf{b}}_1(n) - \mathbf{b}_1(n)] \\ &\leq 0. \end{aligned}$$

Given  $A_8$ , we have  $[\tilde{\mathbf{b}}_1(n) - \mathbf{b}_1(n)]^T \mathbf{Z}_1^T(n) \mathbf{Z}_1(n) [\tilde{\mathbf{b}}_1(n) - \mathbf{b}_1(n)] \geq c'_1(n/k_{1,n}) \|\tilde{\mathbf{b}}_1(n) - \mathbf{b}_1(n)\|_{l_2}^2$ . Since the approximation error  $e_1(t)$  is bounded below  $Ck_{1,n}^{-r}$  in absolute value for some constant  $C$ ,  $A_2$  ensures that  $\sup |\epsilon_{1,i} - e_i| \leq M' C k_{1,n}^{-1}$ . Thus, the term  $\|\mathbf{Z}_1^T(n) \boldsymbol{\epsilon}_1(n)\|_{l_2} = \|\mathbf{Z}_1^T(n) \mathbf{e}(n) + \mathbf{Z}_1^T(n) (\boldsymbol{\epsilon}_1(n) - \mathbf{e}(n))\|_{l_2}$  is dominated by  $\|\mathbf{Z}_1^T(n) \mathbf{e}(n)\|_{l_2}$ . Given  $\mathbf{e}(n) \sim N(0, I_n)$ , we have  $n^{-1/2}(\mathbf{Z}_1^T(n) \mathbf{e}(n)) \sim N(0, n^{-1} \mathbf{Z}_1^T(n) \mathbf{Z}_1(n))$ , which indicates  $(n^{-1} \mathbf{Z}_1^T(n) \mathbf{Z}_1(n))^{-1/2} n^{-1/2} (\mathbf{Z}_1^T(n) \mathbf{e}(n)) \sim N(0, I_{k_{1,n}+h})$ , where  $h+1$  is the B-spline basis function order. Therefore we have  $\|(n^{-1} \mathbf{Z}_1^T(n) \mathbf{Z}_1(n))^{-1/2} n^{-1/2} \mathbf{Z}_1^T(n) \mathbf{e}(n)\|_{l_2}^2 \sim \chi^2(k_{1,n} + h)$ . Given  $A_8$ , we have

$$\|\mathbf{Z}_1^T(n) \boldsymbol{\epsilon}_1(n)\|_{l_2} = O_p(n^{1/2}). \quad (1)$$

Therefore,

$$\begin{aligned} & c'_1(n/k_{1,n}) \|\tilde{\mathbf{b}}_1(n) - \mathbf{b}_1(n)\|_{l_2}^2 \\ &\leq [\tilde{\mathbf{b}}_1(n) - \mathbf{b}_1(n)]^T \mathbf{Z}_1^T(n) \mathbf{Z}_1(n) [\tilde{\mathbf{b}}_1(n) - \mathbf{b}_1(n)] \\ &\leq 2(\mathbf{Z}_1^T(n) \boldsymbol{\epsilon}_1(n))^T [\tilde{\mathbf{b}}_1(n) - \mathbf{b}_1(n)] \\ &\leq 2\|\mathbf{Z}_1^T(n) \boldsymbol{\epsilon}_1(n)\|_{l_2} \|\tilde{\mathbf{b}}_1(n) - \mathbf{b}_1(n)\|_{l_2} \\ &= O_p(n^{1/2}) \|\tilde{\mathbf{b}}_1(n) - \mathbf{b}_1(n)\|_{l_2}, \end{aligned}$$

which indicates  $\|\tilde{\mathbf{b}}_1(n) - \mathbf{b}_1(n)\|_{l_2} = O_p(n^{-1/2}k_{1,n})$ .  $\square$

**Proof of Theorem 1, Part (iii):**

Assuming  $A_6$ , with probability tending to 1, the coefficients  $b_{0,j}(n)$  that are associated with  $\mathcal{T}$  are identified correctly with the threshold value  $d_n$ , and, thus, the subintervals  $I_j$  that are in  $\mathcal{T}$  are identified correctly into  $\hat{\mathcal{T}}^{(0)}$ . For a subinterval  $I_j \subseteq \{t \in [0, T] : |\beta(t)| \geq k_{0,n}^{-r+2}\}$ , the associated coefficients are  $b_{0,j}(n), \dots, b_{0,j+h}(n)$ . Taking  $t_0 \in I_j$ , we have  $\beta(t_0) = \sum_{k=0}^h B_{0,j+k}(t_0)b_{0,j+k}(n) + e_0(t_0)$ , where  $|e_0(t)| \leq ck_{0,n}^{-r}$  is the approximation error. Given the B-spline basis functions are all bounded between 0 and 1, we have that

$$\sum_{k=0}^h |b_{0,j+k}(n)| \geq \left| \sum_{k=0}^h B_{0,j+k}(t_0)b_{0,j+k}(n) \right| = |\beta(t_0) - e_0(t_0)| \geq k_{0,n}^{-r+2} - ck_{0,n}^{-r}.$$

Thus, we have that, when  $k_{0,n}$  is large enough,  $\sum_{k=0}^h |b_{0,j+k}(n)| \geq (1/2)k_{0,n}^{-r+2}$ , and at least one of the coefficients  $b_{0,j}(n)$  associated with  $I_j$  is larger than  $(1/2)(h+1)^{-1}k_{0,n}^{-r+2}$  in absolute value. Given  $A_5$ , with probability tending to 1, at least one of the estimated coefficients  $\tilde{b}_{0,j}(n)$  associated with  $I_j$  is larger than  $(1/4)(h+1)^{-1}k_{0,n}^{-r+2}$  in absolute value as  $k_{0,n}$  goes to infinity. By  $A_6$ , the subinterval  $I_j \subseteq \{t \in [0, T] : |\beta(t)| \geq k_{0,n}^{-r+2}\}$  is identified correctly into  $\hat{\mathcal{T}}^{(0),c}$  with probability tending to 1.

In summary, we have that the subintervals  $I_j$  in  $\mathcal{T}$  are identified into  $\hat{\mathcal{T}}^{(0)}$  and the subintervals  $I_j$  in  $\{t \in [0, T] : |\beta(t)| \geq k_{0,n}^{-r+2}\}$  are identified into  $\hat{\mathcal{T}}^{(0),c}$  with probability tending to 1. As a result, when the length of  $I_j$  goes to 0 as  $k_{0,n}$  goes to  $\infty$ , we have  $\mathcal{T} \subseteq \hat{\mathcal{T}}^{(0)}$  and  $\hat{\mathcal{T}}^{(0)} \cap \mathcal{T}^c \subseteq \Omega(k_{0,n})$  with probability tending to 1, where  $\Omega(k_{0,n}) = \{t \in [0, T] : 0 < |\beta(t)| < k_{0,n}^{-r+2}\}$  as defined in Theorem 1. The sub-region  $\Omega(k_{0,n})$  converges to the empty region as  $k_{0,n} \rightarrow \infty$ . Part (iii) is proved.

**Proof of Theorem 2:** First we prove that  $\|\hat{\mathbf{b}}_1(n) - \mathbf{b}_1(n)\|_{l_2} \leq O_p(n^{-1/2}k_{1,n}^{3/2})$ . This is a non-optimal bound for the convergence rate of  $\hat{\mathbf{b}}_1(n)$ , but it is sufficient to use to show the following Oracle property.

For the coefficient  $b_{1,j}(n)$  associated with  $\mathcal{T}$ , given the construction of the  $k_{1,n} + 1$  adaptive knots, the results of Lemma 1 applies, i.e.  $|b_{1,j}(n)| \leq Ck_{1,n}^{-r}$  for some constant  $C$ . Assume the coefficient  $b_{1,j}(n)$  is associated with the region  $\Omega(k_{0,n})$ . The construction of the  $k_{1,n} + 1$  adaptive knots indicates that the knots

are evenly-spaced on  $\Omega(k_{0,n})$ . Since  $|\beta(t)| < k_{0,n}^{-r+2}$  when  $t \in \Omega(k_{0,n})$ , as in Lemma 1, given  $A_5$ , it is true that  $|b_{1,j}(n)| < C'k_{0,n}^{-r+2}$  for  $b_{1,j}(n)$  associated with  $\Omega(k_{0,n})$ , where  $C'$  is a constant. Recall that  $\mathbf{b}_{1N}(n)$  and  $\mathbf{b}_{1S}(n)$  are the division of  $\mathbf{b}_1(n)$  according to  $\hat{\mathcal{J}}^{(0)}$ . Since  $\mathbf{b}_{1N}(n)$  contains the coefficients associated with  $\hat{\mathcal{J}}^{(0)}$ , given the results in Theorem 1 (iii), these coefficients are either associated with  $\mathcal{T}$  or with  $\Omega(k_{0,n})$ . Also, there are only a finite number of coefficients in  $\mathbf{b}_{1N}(n)$  according to our method to place the  $k_{1,n}$  knots. Thus, given  $A_5$ , we have that  $\|\mathbf{b}_{1N}(n)\|_{l_1} = O_p(k_{0,n}^{-r+2})$ . Let  $M$  be the maximum of  $|\beta(t)|$  on  $\mathcal{T}^c$ . Following the proofs of Part (iii) of Theorem 1, we have that there is at least one coefficient in  $\mathbf{b}_{1S}(n)$  that is greater than  $M/[2(h+1)]$  in absolute value, where  $h+1$  is the fixed spline order. Thus,  $\|\mathbf{b}_{1S}(n)\|_{l_1} \geq O_p(1)$ .

Recall that  $\tilde{\mathbf{b}}_{1N}(n)$  and  $\tilde{\mathbf{b}}_{1S}(n)$  are the division of  $\tilde{\mathbf{b}}_1(n)$  according to  $\hat{\mathcal{J}}^{(0)}$ . Given  $\|\tilde{\mathbf{b}}_{1N}(n) - \mathbf{b}_{1N}(n)\|_{l_1} \leq C\|\tilde{\mathbf{b}}_{1N}(n) - \mathbf{b}_{1N}(n)\|_{l_2} = O_p(n^{-1/2}k_{1,n})$ ,  $\|\mathbf{b}_{1N}(n)\|_{l_1} = O_p(k_{0,n}^{-r+2})$  and  $A_5$ , we have that  $\|\tilde{\mathbf{b}}_{1N}(n)\|_{l_1} = O_p(k_{0,n}^{-r+2})$  and  $\|\tilde{\mathbf{b}}_{1S}(n)\|_{l_2} \geq O_p(1)$ . Given  $A_7$ , with probability tending to 1, we have that  $p'_{\lambda_n}(\|\tilde{\mathbf{b}}_{1N}(n)\|_{l_1}) = \lambda_n$  and  $p'_{\lambda_n}(\|\tilde{\mathbf{b}}_{1S}(n)\|_{l_1}) = 0$ . Since  $\hat{\mathbf{b}}_1(n)$  minimizes  $Q_n\{\mathbf{b}(n)\}$ , with probability tending to 1, we have

$$\begin{aligned}
0 &\geq Q_n\{\hat{\mathbf{b}}_1(n)\} - Q_n\{\mathbf{b}_1(n)\} \\
&= [\hat{\mathbf{b}}_1(n) - \mathbf{b}_1(n)]^T \mathbf{Z}_1^T(n) \mathbf{Z}_1(n) [\hat{\mathbf{b}}_1(n) - \mathbf{b}_1(n)] - 2(\mathbf{Z}_1^T(n) \boldsymbol{\epsilon}_1(n))^T [\hat{\mathbf{b}}_1(n) - \mathbf{b}_1(n)] \\
&\quad + n\lambda_n(\|\hat{\mathbf{b}}_{1N}(n)\|_{l_1} - \|\mathbf{b}_{1N}(n)\|_{l_1}) \\
&\geq [\hat{\mathbf{b}}_1(n) - \mathbf{b}_1(n)]^T \mathbf{Z}_1^T(n) \mathbf{Z}_1(n) [\hat{\mathbf{b}}_1(n) - \mathbf{b}_1(n)] - 2(\mathbf{Z}_1^T(n) \boldsymbol{\epsilon}_1(n))^T [\hat{\mathbf{b}}_1(n) - \mathbf{b}_1(n)] \\
&\quad + n\lambda_n(\|\hat{\mathbf{b}}_{1N}(n) - \mathbf{b}_{1N}(n)\|_{l_1} - 2\|\mathbf{b}_{1N}(n)\|_{l_1}),
\end{aligned}$$

where  $\hat{\mathbf{b}}_{1N}(n)$ ,  $\hat{\mathbf{b}}_{1S}(n)$  and  $\mathbf{b}_{1N}(n)$ ,  $\mathbf{b}_{1S}(n)$  are the divisions of  $\hat{\mathbf{b}}_1(n)$  and  $\mathbf{b}_1(n)$ , respectively, according to their association with  $\hat{\mathcal{J}}^{(0)}$ .

We first show that  $\|\hat{\mathbf{b}}_{1N}(n) - \mathbf{b}_{1N}(n)\|_{l_2} \leq O_p(n^{-1/2}k_{1,n}^{3/2})$ . Suppose that this is not true and that  $\|\hat{\mathbf{b}}_{1N}(n) - \mathbf{b}_{1N}(n)\|_{l_2} > O_p(n^{-1/2}k_{1,n}^{3/2})$ , which indicates  $\|\hat{\mathbf{b}}_{1N}(n) - \mathbf{b}_{1N}(n)\|_{l_1} > O_p(n^{-1/2}k_{1,n}^{3/2})$ . Since  $\|\mathbf{b}_{1N}(n)\|_{l_1} = O_p(k_{0,n}^{-r+2})$ , given  $A_5$ , we have  $\|\hat{\mathbf{b}}_{1N}(n) - \mathbf{b}_{1N}(n)\|_{l_1} - 2\|\mathbf{b}_{1N}(n)\|_{l_1} > 0$  with probability tending to 1.

Given  $Q_n\{\hat{\mathbf{b}}_1(n)\} - Q_n\{\mathbf{b}_1(n)\} \leq 0$  and  $A_8$ , we have, with probability tending to,

$$\begin{aligned} & c'_1(n/k_{1,n})\|\hat{\mathbf{b}}_1(n) - \mathbf{b}_1(n)\|_{l_2}^2 \\ & \leq [\hat{\mathbf{b}}_1(n) - \mathbf{b}_1(n)]^T \mathbf{Z}_1^T(n) \mathbf{Z}_1(n) [\hat{\mathbf{b}}_1(n) - \mathbf{b}_1(n)] \\ & \leq 2(\mathbf{Z}_1^T(n) \boldsymbol{\epsilon}_1(n))^T [\hat{\mathbf{b}}_1(n) - \mathbf{b}_1(n)] \\ & \leq 2\|\mathbf{Z}_1^T(n) \boldsymbol{\epsilon}_1(n)\|_{l_2} \|\hat{\mathbf{b}}_1(n) - \mathbf{b}_1(n)\|_{l_2}. \end{aligned}$$

Given (1), we have  $\|\hat{\mathbf{b}}_{1N}(n) - \mathbf{b}_{1N}(n)\|_{l_2} \leq \|\hat{\mathbf{b}}_1(n) - \mathbf{b}_1(n)\|_{l_2} = O_p(n^{-1/2}k_{1,n})$ , which is contradictive to the assumption  $\|\hat{\mathbf{b}}_{1N}(n) - \mathbf{b}_{1N}(n)\|_{l_2} > O_p(n^{-1/2}k_{1,n}^{3/2})$ .

Therefore we have

$$\|\hat{\mathbf{b}}_{1N}(n) - \mathbf{b}_{1N}(n)\|_{l_2} \leq O_p(n^{-1/2}k_{1,n}^{3/2}). \quad (2)$$

Next, we show that  $\|\hat{\mathbf{b}}_{1S}(n) - \mathbf{b}_{1S}(n)\|_{l_2} = O_p(n^{-1/2}k_{1,n}^{3/2})$ . We first define

$$Q_{n,S}\{\mathbf{b}_S(n)\} = Q_n\{\mathbf{b}(n) | \mathbf{b}_N(n) = \hat{\mathbf{b}}_{1N}(n)\}.$$

Since  $\hat{\mathbf{b}}_1(n)$  minimizes  $Q_n\{\mathbf{b}(n)\}$ , we have that  $\hat{\mathbf{b}}_{1S}(n)$  is the minimizer of  $Q_{n,S}\{\mathbf{b}_S(n)\}$ .

Therefore, when  $n$  is large,

$$\begin{aligned} 0 & \geq Q_{n,S}\{\hat{\mathbf{b}}_{1S}(n)\} - Q_{n,S}\{\mathbf{b}_{1S}(n)\} \\ & = [\hat{\mathbf{b}}_{1S}(n) - \mathbf{b}_{1S}(n)]^T \mathbf{Z}_{1S}^T(n) \mathbf{Z}_{1S}(n) [\hat{\mathbf{b}}_{1S}(n) - \mathbf{b}_{1S}(n)] \\ & \quad - 2[\mathbf{Z}_{1S}^T(n) \boldsymbol{\epsilon}_1(n) - \mathbf{Z}_{1S}^T(n) \mathbf{Z}_{1N}(n) (\hat{\mathbf{b}}_{1N}(n) - \mathbf{b}_{1N}(n))]^T [\hat{\mathbf{b}}_{1S}(n) - \mathbf{b}_{1S}(n)]. \end{aligned}$$

Given  $A_8$ , we have

$$\begin{aligned} & c'_1(n/k_{1,n})\|\hat{\mathbf{b}}_{1S}(n) - \mathbf{b}_{1S}(n)\|_{l_2}^2 \\ & \leq [\hat{\mathbf{b}}_{1S}(n) - \mathbf{b}_{1S}(n)]^T \mathbf{Z}_{1S}^T(n) \mathbf{Z}_{1S}(n) [\hat{\mathbf{b}}_{1S}(n) - \mathbf{b}_{1S}(n)] \\ & \leq 2[\mathbf{Z}_{1S}^T(n) \boldsymbol{\epsilon}_1(n) - \mathbf{Z}_{1S}^T(n) \mathbf{Z}_{1N}(n) (\hat{\mathbf{b}}_{1N}(n) - \mathbf{b}_{1N}(n))]^T [\hat{\mathbf{b}}_{1S}(n) - \mathbf{b}_{1S}(n)] \\ & \leq 2\|\mathbf{Z}_{1S}^T(n) \boldsymbol{\epsilon}_1(n) - \mathbf{Z}_{1S}^T(n) \mathbf{Z}_{1N}(n) (\hat{\mathbf{b}}_{1N}(n) - \mathbf{b}_{1N}(n))\|_{l_2} \|\hat{\mathbf{b}}_{1S}(n) - \mathbf{b}_{1S}(n)\|_{l_2} \\ & \leq 2\{\|\mathbf{Z}_{1S}^T(n) \boldsymbol{\epsilon}_1(n)\|_{l_2} + \|\mathbf{Z}_{1S}^T(n) \mathbf{Z}_{1N}(n) (\hat{\mathbf{b}}_{1N}(n) - \mathbf{b}_{1N}(n))\|_{l_2}\} \|\hat{\mathbf{b}}_{1S}(n) - \mathbf{b}_{1S}(n)\|_{l_2}. \end{aligned}$$

Following the steps to show (1), we obtain that  $\|\mathbf{Z}_{1S}^T(n) \boldsymbol{\epsilon}_1(n)\|_{l_2} = O_p(n^{1/2})$ .

Since  $\|\hat{\mathbf{b}}_{1N}(n) - \mathbf{b}_{1N}(n)\|_{l_2} = O_p(n^{-1/2}k_{1,n}^{3/2})$ , given  $A_8$ , we have

$$\begin{aligned} & \|\mathbf{Z}_{1S}^T(n) \mathbf{Z}_{1N}(n) (\hat{\mathbf{b}}_{1N}(n) - \mathbf{b}_{1N}(n))\|_{l_2}^2 \\ & = [\hat{\mathbf{b}}_{1N}(n) - \mathbf{b}_{1N}(n)]^T \mathbf{Z}_{1N}^T(n) \mathbf{Z}_{1S}(n) \mathbf{Z}_{1S}^T(n) \mathbf{Z}_{1N}(n) [\hat{\mathbf{b}}_{1N}(n) - \mathbf{b}_{1N}(n)] \\ & \leq c_3(n/k_{1,n})\|\hat{\mathbf{b}}_{1N}(n) - \mathbf{b}_{1N}(n)\|_{l_2}^2 \\ & = O_p(k_{1,n}^2). \end{aligned}$$

Thus, we have  $\|\mathbf{Z}_{1S}^T(n)\mathbf{Z}_{1N}(n)(\hat{\mathbf{b}}_{1N}(n) - \mathbf{b}_{1N}(n))\|_{l_2} = O_p(k_{1,n})$ , and

$$\|\hat{\mathbf{b}}_{1S}(n) - \mathbf{b}_{1S}(n)\|_{l_2} \leq O_p(n^{-1/2}k_{1,n}^{3/2}). \quad (3)$$

Given (2) and (3), we have

$$\|\hat{\mathbf{b}}_1(n) - \mathbf{b}_1(n)\|_{l_2} \leq O_p(n^{-1/2}k_{1,n}^{3/2}).$$

Finally, we prove the oracle property of the proposed estimator.

We first show that  $\hat{b}_{1,j}(n) = 0$ , with probability tending to 1, for any  $\hat{b}_{1,j}(n)$  associated with  $\hat{\mathcal{J}}^{(0)}$ . We take the partial derivative of  $Q_n\{\mathbf{b}(n)\}$  at  $\mathbf{b}(n) = \hat{\mathbf{b}}_1(n)$  with respect to  $b_{1,j}(n)$  in  $\mathbf{b}_{1N}(n)$ . As shown above, we have  $p'_{\lambda_n}(\|\tilde{\mathbf{b}}_{1N}(n)\|_{l_1}) = \lambda_n$  and  $p'_{\lambda_n}(\|\tilde{\mathbf{b}}_{1S}(n)\|_{l_1}) = 0$  with probability tending to 1. The partial derivative is then

$$\begin{aligned} & \frac{\partial Q_n\{\mathbf{b}(n)\}}{\partial b_j(n)} \Big|_{\mathbf{b}(n)=\hat{\mathbf{b}}_1(n)} \\ &= \sum_{i=1}^n 2[Y_i - \mathbf{z}_{1,i}\hat{\mathbf{b}}_1(n)](-z_{1,i,j}) + n\lambda_n \text{sign}[\hat{b}_{1,j}(n)] \\ &= \sum_{i=1}^n 2\{Y_i - \mathbf{z}_{1,i}\mathbf{b}_1(n) + \mathbf{z}_{1,i}[\mathbf{b}_1(n) - \hat{\mathbf{b}}_1(n)]\}(-z_{1,i,j}) + n\lambda_n \text{sign}[\hat{b}_{1,j}(n)] \\ &= -2\mathbf{Z}_{1,j}^T(n)\boldsymbol{\epsilon}_1(n) + 2[\hat{\mathbf{b}}_1(n) - \mathbf{b}_1(n)]^T \mathbf{Z}_1^T(n)\mathbf{Z}_{1,j}(n) + n\lambda_n \text{sign}[\hat{b}_{1,j}(n)] \\ &= -I - II + III, \end{aligned}$$

where  $\mathbf{Z}_{1,j}(n)$  is the  $j$ th column of the matrix  $\mathbf{Z}_1(n)$ .

Given  $A_2$  and the uniformly bounded B-spline approximation error, we have  $\sup |\epsilon_{1,i} - e_i| \leq M' C k_{1,n}^{-1}$  for some constant  $C$ . Thus, the term  $\mathbf{Z}_{1,j}^T(n)\boldsymbol{\epsilon}_1(n)$  is dominated by  $\mathbf{Z}_{1,j}(n)\mathbf{e}_n$ . Since  $\mathbf{e}(n) \sim N(0, I_n)$ , we have

$$(k_{1,n}/n)^{1/2} \mathbf{Z}_{1,j}^T(n)\mathbf{e}(n) \sim N[0, (k_{1,n}/n)\mathbf{Z}_{1,j}^T(n)\mathbf{Z}_{1,j}(n)].$$

Given  $A_8$ , we know that  $(k_{1,n}/n)\mathbf{Z}_{1,j}^T(n)\mathbf{Z}_{1,j}(n)$  is between the constants  $c'_1$  and  $c'_2$ . Therefore,

$$(k_{1,n}/n)^{1/2} I = N[0, (k_{1,n}/n)\mathbf{Z}_{1,j}^T(n)\mathbf{Z}_{1,j}(n)] + o_p(1).$$

By  $A_8$ , we have  $\|\mathbf{Z}_1^T(n)\mathbf{Z}_{1,j}(n)\|_{l_2} = O_p(nk_{1,n}^{-1})$ . Thus, we have

$$\begin{aligned} |(k_{1,n}/n)^{1/2}II| &\leq 2(k_{1,n}/n)^{1/2}\|\hat{\mathbf{b}}_1(n) - \mathbf{b}_1(n)\|_{l_2}\|\mathbf{Z}_1^T(n)\mathbf{Z}_{1,j}(n)\|_{l_2} \\ &= 2(k_{1,n}/n)^{1/2}O_p(n^{-1/2}k_{1,n}^{3/2})O_p(nk_{1,n}^{-1}) \\ &= O_p(k_{1,n}). \end{aligned}$$

We also have

$$(k_{1,n}/n)^{1/2}III = n^{1/2}\lambda_n k_{1,n}^{1/2}.$$

Since  $Q_n\{\mathbf{b}(n)\}$  minimizes at  $\hat{\mathbf{b}}_1(n)$ , we have that

$$I + II = III.$$

Given  $A_5$  and  $A_7$ , we have  $|I/III| = o_p(1)$  and  $|II/III| = o_p(1)$ . Therefore,

$$Pr(\hat{b}_{1,j}(n) \neq 0) \leq Pr(I + II = III) \rightarrow 0,$$

indicating that, with probability tending to 1,  $\hat{b}_{1,j}(n) = 0$  for any  $\hat{b}_{1,j}(n)$  associated with  $\hat{\mathcal{T}}^{(0)}$ . Since  $\mathcal{T} \subseteq \hat{\mathcal{T}}^{(0)}$ , with probability tending to 1, as shown in Theorem 1, we have that  $\hat{\beta}(t) = 0$  for  $t \in \mathcal{T}$  with probability tending to 1. Part (i) is proved.

Next, we show the asymptotic distribution of  $\hat{\beta}(t)$  for  $t \in \mathcal{T}^c$ . We first define

$$P_n(\mathbf{b}') = \sum_{i=1}^n (Y_i - \mathbf{z}_{1S,i}\mathbf{b}')^2,$$

where  $\mathbf{z}_{1S,i}$  are the elements of  $\mathbf{z}_{1,i}$  that correspond to the coefficients in  $\mathbf{b}_S(n)$ .

With probability tending to 1,  $\hat{\mathbf{b}}_{1N}(n) = \mathbf{0}$  and  $p'_{\lambda_n}(\|\tilde{\mathbf{b}}_{1S}(n)\|_{l_1}) = 0$  as shown above. Since  $\hat{\mathbf{b}}_1(n)$  minimizes  $Q_n\{\mathbf{b}(n)\}$ , we know that  $\hat{\mathbf{b}}_{1S}(n)$  is the minimizer of  $P_n(\mathbf{b}')$  and  $\nabla P_n\{\hat{\mathbf{b}}_{1S}(n)\} = \mathbf{0}$ , with probability tending to 1. Using the Taylor expansion of  $\nabla P_n\{\hat{\mathbf{b}}_{1S}(n)\}$  at  $\mathbf{b}_{1S}(n)$ , we have

$$\nabla P_n\{\hat{\mathbf{b}}_{1S}(n)\} = \nabla P_n\{\mathbf{b}_{1S}(n)\} + \nabla^2 P_n(\mathbf{b}^*)[\hat{\mathbf{b}}_{1S}(n) - \mathbf{b}_{1S}(n)],$$

where  $\mathbf{b}^*$  is a point between  $\hat{\mathbf{b}}_{1S}(n)$  and  $\mathbf{b}_{1S}(n)$ . Thus, we have

$$\begin{aligned} \hat{\mathbf{b}}_{1S}(n) - \mathbf{b}_{1S}(n) &= -(\nabla^2 P_n(\mathbf{b}^*))^{-1}\nabla P_n\{\mathbf{b}_{1S}(n)\} \\ &= (\mathbf{Z}_{1S}^T(n)\mathbf{Z}_{1S}(n))^{-1}\mathbf{Z}_{1S}^T(n)[\boldsymbol{\epsilon}_1(n) + \mathbf{Z}_{1N}(n)\mathbf{b}_{1N}(n)], \end{aligned}$$



where  $\mathbf{Z}_{1N}(n)$  and  $\mathbf{Z}_{1S}(n)$  are sub-matrices of  $\mathbf{Z}_1(n)$  corresponding to the coefficients in  $\mathbf{b}_{1N}(n)$  and  $\mathbf{b}_{1S}(n)$ , respectively. Recall that  $\mathbf{B}_1(n, t)$  are the B-spline basis functions evaluated at  $t$ . Let  $\mathbf{B}_{1N}(n, t)$  and  $\mathbf{B}_{1S}(n, t)$  be the partitioning of  $\mathbf{B}_1(n, t)$  according to  $\mathbf{b}_{1N}(n)$  and  $\mathbf{b}_{1S}(n)$ .

By Theorem 1, we have  $\hat{\mathcal{J}}^{(0)} \cap \mathcal{T}^c \subseteq \Omega(k_{0,n})$ , where  $\Omega(k_{0,n}) = \{t \in [0, T] : 0 < |\beta(t)| < k_{0,n}^{-r+2}\}$ . For  $t \in \mathcal{T}^c$ , when  $n$  is large enough, we have  $|\beta(t)| > k_{0,n}^{-r+2}$ . Thus, we have that  $t \in \hat{\mathcal{J}}^{(0),c}$  when  $n$  is large enough. As a results, when  $n$  is large enough, we have

$$\begin{aligned}
& (n/k_{1,n})^{1/2}(\hat{\beta}(t) - \beta(t)) \\
&= (n/k_{1,n})^{1/2}\mathbf{B}_{1S}^T(n, t)[\hat{\mathbf{b}}_{1S}(n) - \mathbf{b}_{1S}(n)] + (n/k_{1,n})^{1/2}[\mathbf{B}_1^T(n, t)\mathbf{b}_1(n) - \beta(t)] \\
&= \mathbf{B}_{1S}^T(n, t)[(k_{1,n}/n)\mathbf{Z}_{1S}^T(n)\mathbf{Z}_{1S}(n)]^{-1}\{(n/k_{1,n})^{-1/2}\mathbf{Z}_{1S}^T(n)[\boldsymbol{\epsilon}_1(n) + \mathbf{Z}_{1N}^T(n)\mathbf{b}_{1N}(n)]\} \\
&+ (n/k_{1,n})^{1/2}[\mathbf{B}_1^T(n, t)\mathbf{b}_1(n) - \beta(t)] \\
&= \mathbf{B}_{1S}^T(n, t)[(k_{1,n}/n)\mathbf{Z}_{1S}^T(n)\mathbf{Z}_{1S}(n)]^{-1}[(n/k_{1,n})^{-1/2}\mathbf{Z}_{1S}^T(n)\mathbf{e}(n)] \\
&+ \mathbf{B}_{1S}^T(n, t)[(k_{1,n}/n)\mathbf{Z}_{1S}^T(n)\mathbf{Z}_{1S}(n)]^{-1}[(n/k_{1,n})^{-1/2}\mathbf{Z}_{1S}^T(n)(\boldsymbol{\epsilon}_1(n) - \mathbf{e}(n))] \\
&+ \mathbf{B}_{1S}^T(n, t)[(k_{1,n}/n)\mathbf{Z}_{1S}^T(n)\mathbf{Z}_{1S}(n)]^{-1}[(n/k_{1,n})^{-1/2}\mathbf{Z}_{1S}^T(n)\mathbf{Z}_{1N}(n)\mathbf{b}_{1N}(n)] \\
&+ (n/k_{1,n})^{1/2}[\mathbf{B}_1^T(n, t)\mathbf{b}_1(n) - \beta(t)] \\
&= U_n(t) + (n/k_{1,n})^{1/2}\mathcal{B}'_n(t) + (n/k_{1,n})^{1/2}\mathcal{B}''_n(t) + (n/k_{1,n})^{1/2}\mathcal{W}_n(t)
\end{aligned}$$

By Huang (1998),  $U_n(t)$  is the variance component,  $\mathcal{B}_n(t) = \mathcal{B}'_n(t) + \mathcal{B}''_n(t)$  is the estimation bias, and  $\mathcal{W}_n(t)$  is the approximation error.

Given that  $\mathbf{e}(n) \sim N(0, I_n)$ , we have that, for  $t \in \mathcal{T}^c$ ,

$$U_n(t) \xrightarrow{\mathcal{D}} N[0, \sigma^2(t)]$$

where  $\sigma^2(t) = \lim_{n \rightarrow \infty} \mathbf{B}_{1S}^T(n, t)[(k_{1,n}/n)\mathbf{Z}_{1S}^T(n)\mathbf{Z}_{1S}(n)]^{-1}\mathbf{B}_{1S}(n, t)$ .

Given  $A_8$ , we have that  $\lambda_{max}((k_{1,n}/n)\mathbf{Z}_{1S}(n)\mathbf{Z}_{1S}^T(n)) \leq c'_2$ . As shown above, we have  $\sup |\epsilon_{1,i} - e_i| \leq M' C k_{1,n}^{-r}$  for some constant  $C$ . Thus, we have that

$$\begin{aligned}
& (n/k_{1,n})^{-1}(\boldsymbol{\epsilon}_1(n) - \mathbf{e}(n))^T \mathbf{Z}_{1S}(n)\mathbf{Z}_{1S}^T(n)(\boldsymbol{\epsilon}_1(n) - \mathbf{e}(n)) \\
&= (\boldsymbol{\epsilon}_1(n) - \mathbf{e}(n))^T [(k_{1,n}/n)\mathbf{Z}_{1S}(n)\mathbf{Z}_{1S}^T(n)](\boldsymbol{\epsilon}_1(n) - \mathbf{e}(n)) \\
&\leq c'_2(\boldsymbol{\epsilon}_1(n) - \mathbf{e}(n))^T(\boldsymbol{\epsilon}_1(n) - \mathbf{e}(n)) \\
&\leq c'_2(M' C)^2 n k_{1,n}^{-2r}.
\end{aligned}$$

Thus, we have  $\|(n/k_{1,n})^{-1/2}\mathbf{Z}_{1S}^T(n)(\boldsymbol{\epsilon}_1(n) - \mathbf{e}(n))\|_{l_2} \leq C'n^{1/2}k_{1,n}^{-r}$  for some constant  $C'$ . Since  $\mathbf{B}_{1S}(n, t)$  are bounded and at most  $h$  of them are nonzero, given  $A_8$ , we have

$$(n/k_{1,n})^{1/2}|\mathcal{B}'_n(t)| = O_p(n^{1/2}k_{1,n}^{-r}).$$

Given  $A_8$ , we have

$$\begin{aligned} & (n/k_{1,n})^{-1}\mathbf{b}_{1N}^T(n)\mathbf{Z}_{1N}^T(n)\mathbf{Z}_{1S}(n)\mathbf{Z}_{1S}^T(n)\mathbf{Z}_{1N}(n)\mathbf{b}_{1N}(n) \\ & \leq c_2'^2\|\mathbf{b}_{1N}(n)\|_{l_2}^2 \end{aligned}$$

Given  $A_5$ , each coefficient in  $\mathbf{b}_{1N}(n)$  is bounded by  $C'k_{0,n}^{-r+2}$  for some constant  $C'$  when  $n$  is large enough, as shown in the proof above, and there are a finite number of coefficients in  $\mathbf{b}_{1N}(n)$ . Thus, we obtain that  $\|\mathbf{b}_{1N}(n)\|_{l_2}^2 = O_p(k_{0,n}^{-2r+4})$  and  $\|(n/k_{1,n})^{-1/2}\mathbf{Z}_{1S}^T(n)\mathbf{Z}_{1N}(n)\mathbf{b}_{1N}(n)\|_{l_2} = O_p(k_{0,n}^{-r+2})$ . Given  $A_7$ , we have that  $k_{0,n}^{-r+2} = o_p(1)$ . Therefore,

$$(n/k_{1,n})^{1/2}|\mathcal{B}''_n(t)| = o_p(1).$$

Therefore we have

$$(n/k_{1,n})^{1/2}|\mathcal{B}_n(t)| = O_p(n^{1/2}k_{1,n}^{-r}).$$

The term  $\mathcal{W}_n(t)$  is the B-spline approximation error at  $\beta(t)$ . Given  $A_1$  and the B-spline approximation property, we have

$$(n/k_{1,n})^{1/2}|\mathcal{W}_n(t)| = O_p(n^{1/2}k_{1,n}^{-r-1/2}).$$

Therefore we have, for  $t \in \mathcal{T}^c$ ,

$$(n/k_{1,n})^{1/2}[\hat{\beta}(t) - \beta(t) - \mathcal{B}_n(t) - \mathcal{W}_n(t)] \xrightarrow{\mathcal{D}} N[0, \sigma^2(t)].$$

Part (ii) is proved.

Assuming the additional stronger condition  $n^{-1}k_{1,n}^{2r} \rightarrow \infty$  in  $A_5$ , it follows that  $(n/k_{1,n})^{1/2}|\mathcal{B}_n(t)| = o_p(1)$  and  $(n/k_{1,n})^{1/2}|\mathcal{W}_n(t)| = o_p(1)$ . Therefore we have, for  $t \in \mathcal{T}^c$ ,

$$(n/k_{1,n})^{1/2}[\hat{\beta}(t) - \beta(t)] \xrightarrow{\mathcal{D}} N[0, \sigma^2(t)].$$

Part (iii) is proved.

The proof of Theorem 2 is completed.  $\square$ .

### Performance of GCV, AIC, BIC and RIC in Studies 1 and 2:

Table 1: Integrated absolute biases of the least squares, the Dantzig selector, the adaptive LASSO (adpLASSO), and the one-step group SCAD (gSCAD) estimates for Study 1. Each entry is the Monte Carlo average of  $A_j$ ,  $j = 0$  or  $1$ ; the corresponding standard deviation is reported in parentheses.

| Estimator        | $\beta_1(t)$  |               | $\beta_2(t)$  |               |
|------------------|---------------|---------------|---------------|---------------|
|                  | $A_0$         | $A_1$         | $A_0$         | $A_1$         |
| Oracle Estimator | -             | 0.157 (0.041) | -             | 0.166 (0.046) |
| Least Squares    | 2.205 (1.432) | 3.283 (2.549) | 1.963 (1.256) | 4.088 (2.716) |
| Dantzig Selector | 0.006 (0.013) | 0.692 (0.094) | 0.006 (0.010) | 0.821 (0.132) |
| adpLASSO GCV     | 0.039 (0.031) | 0.196 (0.059) | 0.034 (0.028) | 0.218 (0.070) |
| adpLASSO AIC     | 0.041 (0.030) | 0.193 (0.059) | 0.036 (0.028) | 0.214 (0.069) |
| adpLASSO BIC     | 0.031 (0.031) | 0.212 (0.059) | 0.025 (0.029) | 0.240 (0.074) |
| adpLASSO RIC     | 0.030 (0.031) | 0.213 (0.059) | 0.024 (0.028) | 0.241 (0.074) |
| gSCAD GCV        | 0.016 (0.026) | 0.141 (0.038) | 0.015 (0.023) | 0.154 (0.046) |
| gSCAD AIC        | 0.024 (0.033) | 0.143 (0.038) | 0.024 (0.030) | 0.155 (0.048) |
| gSCAD BIC        | 0.004 (0.013) | 0.140 (0.037) | 0.003 (0.009) | 0.154 (0.049) |
| gSCAD RIC        | 0.003 (0.011) | 0.140 (0.037) | 0.002 (0.007) | 0.155 (0.049) |

Table 2: Null region estimates for Study 1. Each entry is the Monte Carlo average of estimated boundary of the null region; the corresponding standard deviation is reported in parentheses.

| Estimator        | $\beta_1(t)$  |               | $\beta_2(t)$  |               |
|------------------|---------------|---------------|---------------|---------------|
|                  | lower         | upper         | lower         | upper         |
| Dantzig Selector | 0.008 (0.064) | 6.230 (0.175) | 0.002 (0.038) | 7.123 (0.202) |
| gSCAD GCV        | 0.010 (0.082) | 5.926 (0.268) | 0.003 (0.051) | 6.818 (0.292) |
| gSCAD AIC        | 0.011 (0.091) | 5.773 (0.479) | 0.004 (0.063) | 6.666 (0.528) |
| gSCAD BIC        | 0.010 (0.082) | 6.058 (0.171) | 0.003 (0.051) | 6.951 (0.181) |
| gSCAD RIC        | 0.010 (0.082) | 6.067 (0.168) | 0.003 (0.051) | 6.960 (0.179) |

Table 3: Monte Carlo bias, standard deviation (SD), mean squared error (MSE), and empirical coverage probability (CP) of 95% pointwise confidence intervals of group SCAD (gSCAD) estimates for Study 1. Each entry is the average over the selected points in the non-null region of  $\beta_1(t)$  or  $\beta_2(t)$ ; the corresponding standard deviation is reported in parentheses.

| Estimator | $\beta_1(t)$   |               |               |               |
|-----------|----------------|---------------|---------------|---------------|
|           | Ave. MC Bias   | Ave. MC SD    | Ave. MC MSE   | CP            |
| gSCAD GCV | 0.003 (0.013)  | 0.198 (0.213) | 0.083 (0.328) | 0.932 (0.059) |
| gSCAD AIC | 0.004 (0.013)  | 0.201 (0.213) | 0.085 (0.331) | 0.932 (0.047) |
| gSCAD BIC | -0.001 (0.019) | 0.195 (0.218) | 0.084 (0.339) | 0.928 (0.094) |
| gSCAD RIC | -0.001 (0.022) | 0.194 (0.218) | 0.084 (0.338) | 0.927 (0.101) |
| Estimator | $\beta_2(t)$   |               |               |               |
|           | Ave. MC Bias   | Ave. MC SD    | Ave. MC MSE   | CP            |
| gSCAD GCV | -0.007 (0.033) | 0.221 (0.244) | 0.107 (0.386) | 0.925 (0.067) |
| gSCAD AIC | -0.006 (0.031) | 0.224 (0.247) | 0.110 (0.394) | 0.924 (0.053) |
| gSCAD BIC | -0.012 (0.043) | 0.221 (0.242) | 0.107 (0.378) | 0.915 (0.098) |
| gSCAD RIC | -0.013 (0.044) | 0.221 (0.242) | 0.107 (0.379) | 0.912 (0.105) |

Table 4: Integrated absolute biases of the least squares, the Dantzig selector, the adaptive LASSO (adpLASSO), and the one-step group SCAD (gSCAD) estimates for Study 2. Each entry is the Monte Carlo average of  $A_j$ ,  $j = 0$  or  $1$ ; the corresponding standard deviation is reported in parentheses.

| Estimator        | $A_0$         | $A_1$         |
|------------------|---------------|---------------|
| Oracle Estimator | -             | 0.257 (0.054) |
| Least Squares    | 0.246 (0.060) | 0.240 (0.054) |
| Dantzig Selector | 0.006 (0.007) | 0.485 (0.069) |
| adpLASSO GCV     | 0.064 (0.062) | 0.246 (0.063) |
| adpLASSO AIC     | 0.066 (0.063) | 0.246 (0.063) |
| adpLASSO BIC     | 0.023 (0.041) | 0.278 (0.079) |
| adpLASSO RIC     | 0.018 (0.034) | 0.288 (0.084) |
| gSCAD GCV        | 0.034 (0.071) | 0.230 (0.054) |
| gSCAD AIC        | 0.038 (0.076) | 0.230 (0.054) |
| gSCAD BIC        | 0.009 (0.020) | 0.226 (0.056) |
| gSCAD RIC        | 0.009 (0.019) | 0.226 (0.056) |

Table 5: Null region estimates for Study 2. Each entry is the Monte Carlo average of estimated boundary of the null region; the corresponding standard deviation is reported in parentheses.

| Estimator        | [0.000, 0.200] |               | [0.486, 0.771] |               |
|------------------|----------------|---------------|----------------|---------------|
|                  | lower          | upper         | lower          | upper         |
| Dantzig Selector | 0.001 (0.009)  | 0.199 (0.016) | 0.502 (0.014)  | 0.749 (0.008) |
| gSCAD GCV        | 0.001 (0.009)  | 0.194 (0.020) | 0.507 (0.019)  | 0.744 (0.015) |
| gSCAD AIC        | 0.001 (0.009)  | 0.194 (0.021) | 0.507 (0.019)  | 0.744 (0.016) |
| gSCAD BIC        | 0.001 (0.009)  | 0.199 (0.016) | 0.502 (0.014)  | 0.749 (0.008) |
| gSCAD RIC        | 0.001 (0.009)  | 0.199 (0.016) | 0.502 (0.014)  | 0.749 (0.008) |

Table 6: Monte Carlo bias, standard deviation (SD), mean squared error (MSE), and empirical coverage probability (CP) of 95% pointwise confidence intervals of group SCAD (gSCAD) estimates for Study 2. Each entry is the average over the selected points in the non-null region of  $\beta_1(t)$  or  $\beta_2(t)$ ; the corresponding standard deviation is reported in parentheses.

| Estimator | $\beta_1(t)$   |               |               |               |
|-----------|----------------|---------------|---------------|---------------|
|           | Ave. MC Bias   | Ave. MC SD    | Ave. MC MSE   | CP            |
| gSCAD GCV | -0.013 (0.058) | 0.295 (0.174) | 0.119 (0.266) | 0.951 (0.016) |
| gSCAD AIC | -0.012 (0.055) | 0.296 (0.173) | 0.120 (0.265) | 0.950 (0.016) |
| gSCAD BIC | -0.020 (0.072) | 0.286 (0.183) | 0.120 (0.272) | 0.951 (0.020) |
| gSCAD RIC | -0.020 (0.072) | 0.286 (0.183) | 0.120 (0.272) | 0.951 (0.020) |

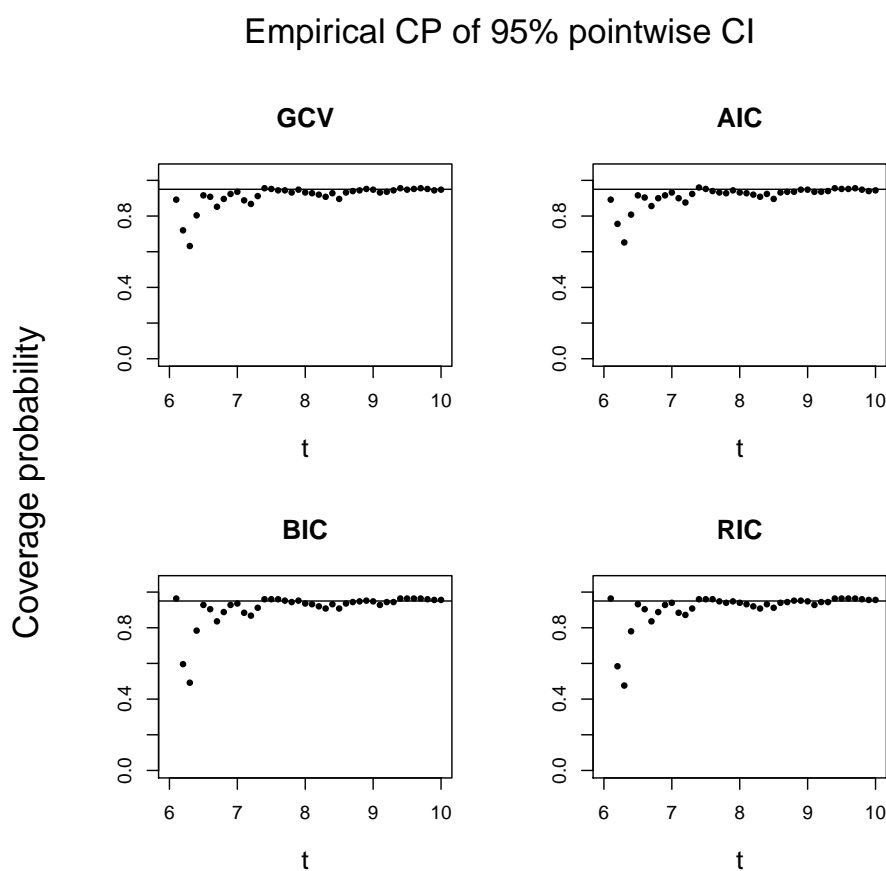

Figure 1: Empirical coverage probabilities (CP) of 95% pointwise confidence intervals for coefficient estimate over non-null region of  $\beta_1(t)$  for Study 1, by GCV, AIC, BIC and RIC, respectively. The points are taken at  $t = 6.1, 6.2, \dots, 10.0$ .

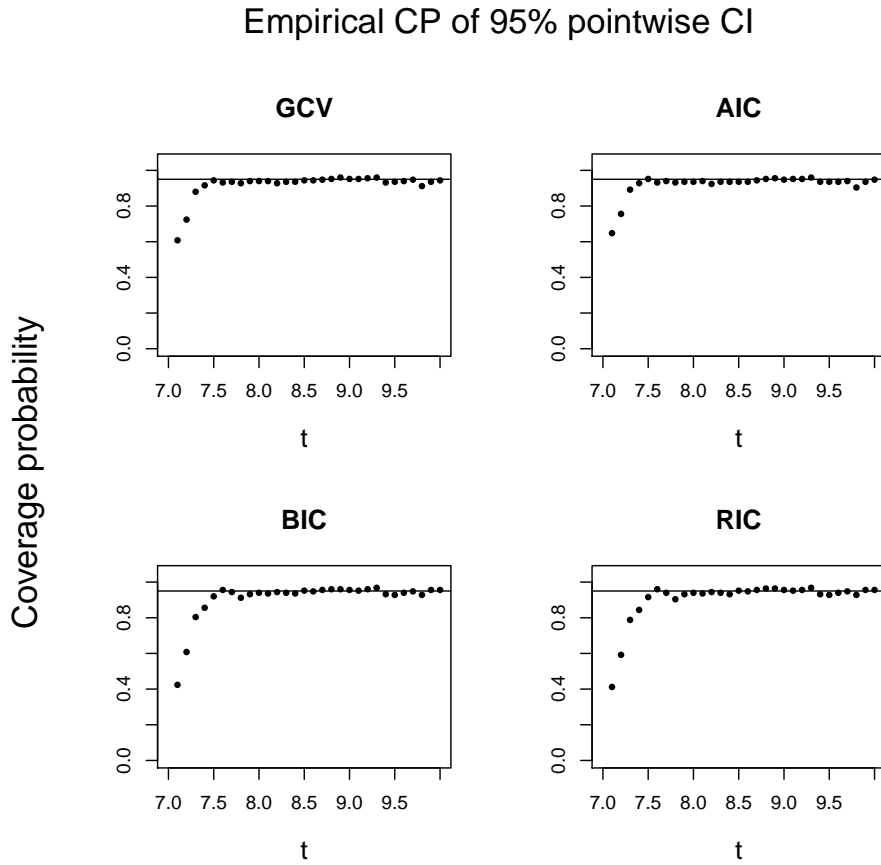

Figure 2: Empirical coverage probabilities (CP) of 95% pointwise confidence intervals for coefficient estimate over non-null region of  $\beta_2(t)$  for Study 1, by GCV, AIC, BIC and RIC, respectively. The points are taken at  $t = 7.1, 7.2, \dots, 10.0$ .



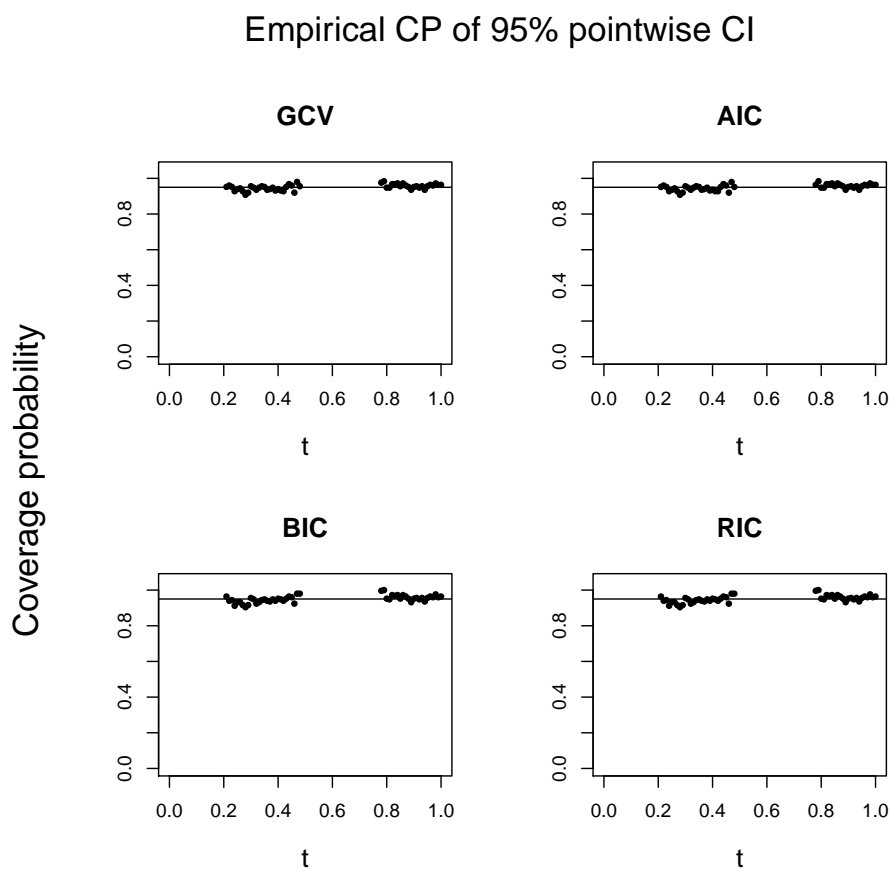

Figure 3: Empirical coverage probabilities (CP) of 95% pointwise confidence intervals for coefficient estimate over non-null region of  $\beta(t)$  for Study 2, by GCV, AIC, BIC and RIC, respectively. The points are taken at  $t = 0.21, 0.22, \dots, 0.48, 0.78, 0.79, \dots, 0.99, 1.00..$
